# Supplementary material for: Green synthesis of the copper and iron phthalocyanine-based metal–organic framework as an efficient catalyst for methylene blue dye degradation and oxidation of cyclohexane
Source: Royal Society of Chemistry journal article supplement (doi:10.1039/d3re00343d), 2023-01-01
Supplement: d3re00343d1.pdf [file d3re00343d1.pdf]

# **Green synthesis of the copper and iron phthalocyanine-based metal-organic framework as an efficient catalyst for methylene blue dye degradation and oxidation of cyclohexane**

Rupali S. Bhise, Yogesh A. Patil, Ganapati S. Shankarling\*

Department of Specialty Chemicals Technology, Institute of Chemical Technology, N. P. Marg, Matunga, Mumbai - 400019, India. Tel: 91-22-33612708, Fax: +91-22-33611020 E-mail address: [gs.shankarling@ictmumbai.edu.in](mailto:gs.shankarling@ictmumbai.edu.in), [gsshankarling@gmail.com](mailto:gsshankarling@gmail.com)

---

|          |                             |           |
|----------|-----------------------------|-----------|
| <b>1</b> | <b>General</b>              | <b>S2</b> |
| <b>2</b> | <b>Experimental section</b> | <b>S4</b> |
| <b>3</b> | <b>References</b>           | <b>S5</b> |

---

## General

## Experimental

### Materials

Copper (II) nitrate tetrahydrate ( $\text{Cu}(\text{NO}_3)_2 \cdot 4\text{H}_2\text{O}$ ), Trimellitic anhydride ( $\text{C}_9\text{H}_4\text{O}_5$ ), ammonium molybdic acid ( $(\text{NH}_4)_2\text{MoO}_4$ ), hydrogen peroxide ( $\text{H}_2\text{O}_2$ , 30%, w/v), ethanol ( $\text{C}_2\text{H}_5\text{OH}$ ), Nitrobenzene ( $\text{C}_6\text{H}_5\text{NO}_2$ ), Methylene Blue dye ( $\text{C}_{16}\text{H}_{18}\text{N}_3\text{SCl}$ ), Cyclohexane ( $\text{C}_6\text{H}_{12}$ ), tert-Butyl hydroperoxide (TBHP, 70 %), Acetonitrile were purchased S. D. Fine Chem Limited. All chemicals were employed as received without further purification. All degradation experiments were carried out using distilled water.

### Synthesis of Tetra carboxyl Iron Phthalocyanine (TCFePc) <sup>1</sup>

The TCFePc was produced according to the method described<sup>1</sup>. The combination of trimellitic anhydride (33.0 g, 187 mmol),  $\text{FeCl}_2 \cdot 4\text{H}_2\text{O}$  (9.5 g, 50 mmol),  $\text{NH}_4\text{Cl}$  (4.5 g, 86 mmol), ammonium molybdic acid (0.5 g, 3 mmol) and finely crushed urea in 35 ml nitrobenzene was added into a 500 ml three-neck flask equipped with a magnetic stirrer and reflux condenser; This resulting mixture was stirred at 185°C for 3.5 hours. The resulting mixture was then washed with methanol until no nitrobenzene could be detected, and a black-blue solid iron tetraformamido phthalocyanine was obtained. After about 3 minutes of boiling in saturated sodium chloride solution and filtering, the filter cake was transferred to a 2.0 M NaOH solution saturated with NaCl in a 500 ml three-neck flask. The reaction was carried out at 90°C for 10 hours until the ammonia was released. The resultant solution, diluted with a suitable amount of deionized water, is adjusted to pH <3 with concentrated hydrochloric acid; Then centrifugation and filtration were carried out, followed by dissolving the well with 0.5 M NaOH filtration solution. After three repetitions, the resulting solid was neutralized first with water and then with methanol. Obtained as a blue-black solid (13.4 g, 34.8%) by drying in vacuum.

### Synthesis of Copper-Iron Phthalocyanine Metal-organic framework (Cu-FePC MOF)

As shown in **Fig.S1**. The organometallic Cu-FePc framework was synthesized in water under ambient conditions using the organic linking salt method for a short period of synthesis time. In the preparation, a clear solution of 24 mg (0.1 mmol) of copper nitrate tetrahydrate salt,  $\text{Cu}(\text{NO}_3)_2 \cdot 4\text{H}_2\text{O}$ , in 10 mL of  $\text{H}_2\text{O}$  was added dropwise over another clear solution of 37 mg (0.05 mmol) of tetrasodiumcarboxylate iron phthalocyanine ( $\text{Na}_4\text{TCFePc}$ ) in 50 mL of  $\text{H}_2\text{O}$  formed by dissolving under stirring at room temperature. Such addition provokes the

immediate appearance of a precipitate. The mixture was then transferred to the sonication. The reaction mixture was kept under sonication at room temperature for 45 min. A representative aliquot was collected at different reaction times: 10 min, 20 min, 30 min, and 45 min. The blue-black precipitate of an aliquot was washed with distilled water repeatedly and dried at room temperature overnight. The synthesized Cu-FePC MOF was characterized by PXRD, FT-IR, SEM, TGA and BET analysis techniques.

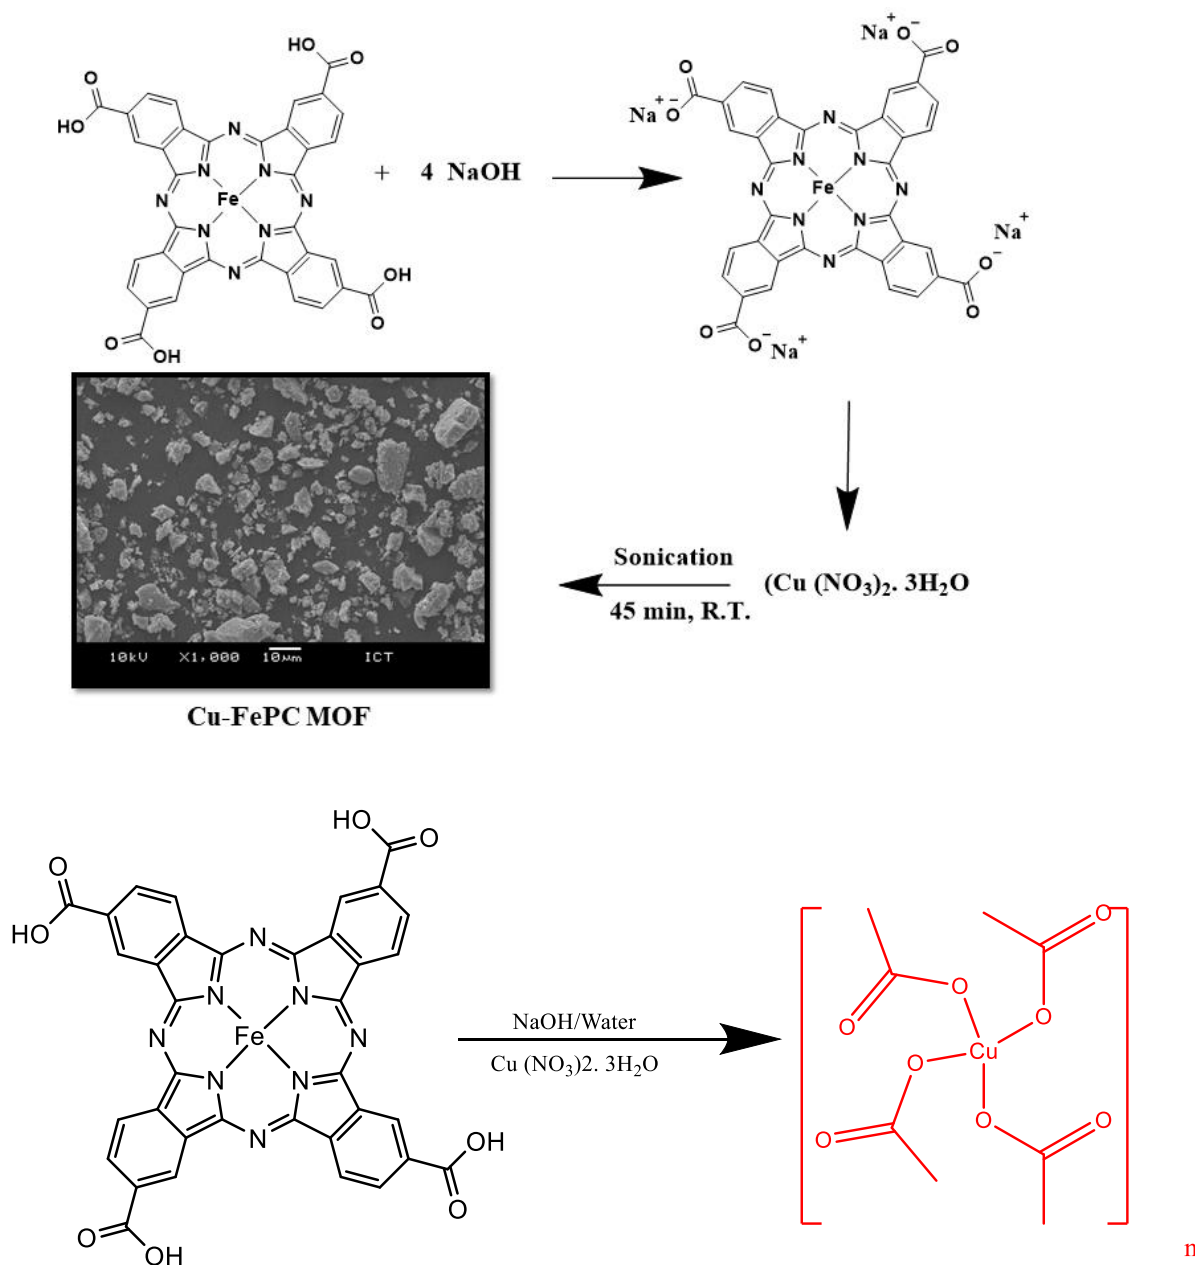

**Fig. S1.** Synthesis of copper iron phthalocyanine-based Metal-organic framework<sup>2</sup>

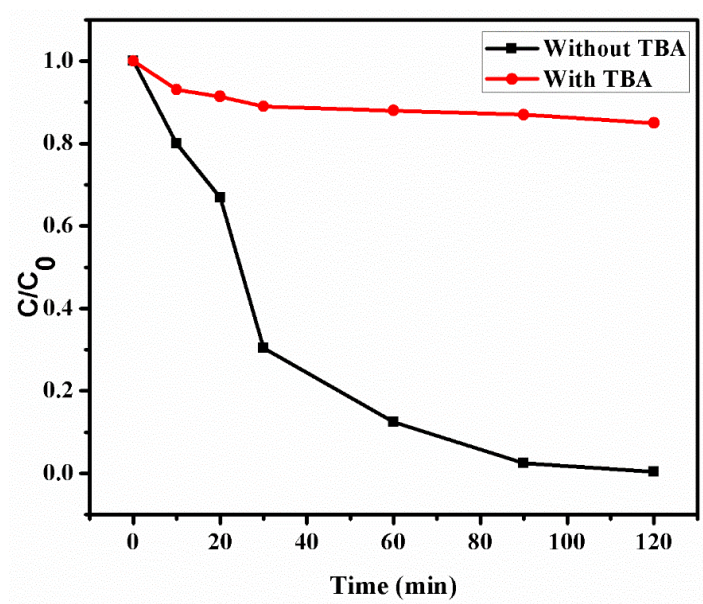

**Figure S2.** MB dye degradation experiments with and without TBA.

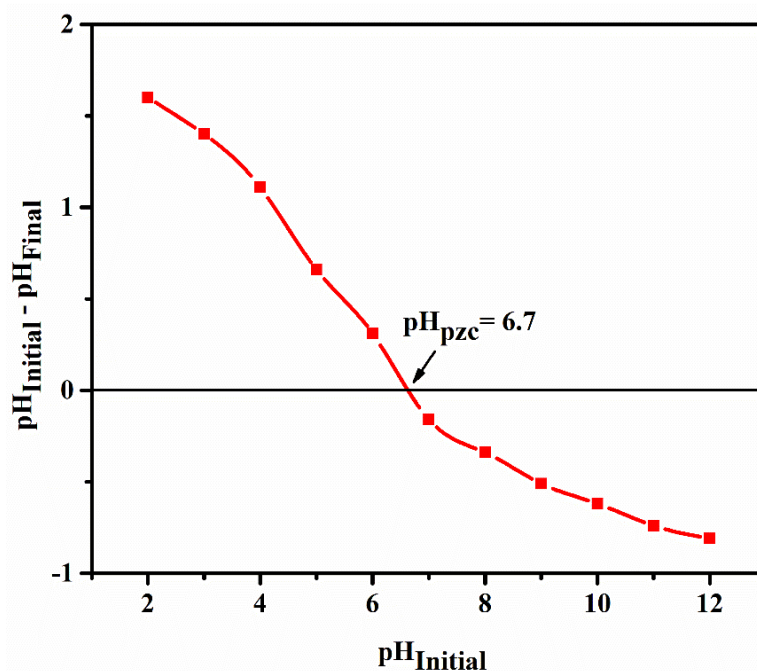

**Figure S3.** The point zero charge (pzc) of the Copper-Iron Phthalocyanine Metal-organic framework (Cu-FePC MOF)

## References

- 1 Song, X.; She, Y.; Ji, H.; Zhang, Y. Highly Efficient, Mild, Bromide-Free and Acetic Acid-Free Dioxygen Oxidation of p-Nitrotoluene to p-Nitrobenzoic Acid with Metal Phthalocyanine Catalysts. *Org. Process Res. Dev.* **2005**, *9* (3), 297–301.  
<https://doi.org/10.1021/op049810b>.
- 2 Y. Liu, Y. Yang, Q. Sun, Z. Wang, B. Huang, Y. Dai, X. Qin and X. Zhang, *ACS Appl. Mater. Interfaces*, 2013, **5**, 7654–7658.
